# Supplementary material for: Density functional theory study of the aluminium(iii) hydrolysis in aqueous solution
Source: Royal Society of Chemistry journal article supplement (doi:10.1039/b819484j), 2009-01-01
Supplement: b819484j.pdf [file b819484j.pdf]

## Electronic Supplementary Information

### Density functional theory study of aluminium(III) hydrolysis in aqueous solution

Wenjing Yang, Zhaosheng Qian, Qiang Miao, Yingjie Wang and Shuping Bi\*

School of Chemistry and Chemical Engineering, State Key Laboratory of Coordination Chemistry of  
China & Key Laboratory of MOE for Life Science, Nanjing University, Nanjing 210093, China

#### 1. The calculated Gibbs free energies and the solvation energies of the gas phase structures using the supermolecule density functional calculations

Table S1 The Gibbs free energies and the solvation energies of the most stable structures

| Charge | Complex                                                                                            | Gibbs free energies / a.u. | Solvation energies / kcal·mol <sup>-1</sup> |
|--------|----------------------------------------------------------------------------------------------------|----------------------------|---------------------------------------------|
| +3     | Al(H <sub>2</sub> O) <sub>6</sub> <sup>3+</sup> •12H <sub>2</sub> O                                | -1617.446535               | -287.00                                     |
| +2     | Al(OH)(H <sub>2</sub> O) <sub>5</sub> <sup>2+</sup> •12H <sub>2</sub> O                            | -1617.254043               | -134.18                                     |
| +1     | <i>trans</i> -Al(OH) <sub>2</sub> (H <sub>2</sub> O) <sub>4</sub> <sup>+</sup> •12H <sub>2</sub> O | -1616.957174               | -43.38                                      |
| 0      | <i>trans</i> -Al(OH) <sub>3</sub> (H <sub>2</sub> O) <sub>2</sub> •13H <sub>2</sub> O              | -1616.558109               | -11.63                                      |
| -1     | Al(OH) <sub>4</sub> <sup>-</sup> •14H <sub>2</sub> O                                               | -1616.084592               | -35.14                                      |
| 0      | H <sub>2</sub> O                                                                                   | -76.430410                 | -6.94                                       |
| +1     | H <sub>3</sub> O <sup>+</sup>                                                                      | -76.692613                 | -107.41                                     |

#### 2. The calculated Gibbs free energies and the solvation energies of the solution phase structures using the supermolecule density functional calculations

Table S2 The Gibbs free energies and the solvation energies of the solution phase structures

| Charge | Complex                                                                                            | G <sub>(aq)</sub> / a.u. |
|--------|----------------------------------------------------------------------------------------------------|--------------------------|
| +3     | Al(H <sub>2</sub> O) <sub>6</sub> <sup>3+</sup> •12H <sub>2</sub> O                                | -1617.956263             |
| +2     | Al(OH)(H <sub>2</sub> O) <sub>5</sub> <sup>2+</sup> •12H <sub>2</sub> O                            | -1617.516179             |
| +1     | <i>trans</i> -Al(OH) <sub>2</sub> (H <sub>2</sub> O) <sub>4</sub> <sup>+</sup> •12H <sub>2</sub> O | -1617.073484             |
| 0      | <i>trans</i> -Al(OH) <sub>3</sub> (H <sub>2</sub> O) <sub>2</sub> •13H <sub>2</sub> O              | -1616.627671             |
| -1     | Al(OH) <sub>4</sub> <sup>-</sup> •14H <sub>2</sub> O                                               | -1616.193071             |
| 0      | H <sub>2</sub> O                                                                                   | -76.443627               |
| +1     | H <sub>3</sub> O <sup>+</sup>                                                                      | -76.874444               |

### 3. The calculation of $\Delta G^0$ using solution phase geometries

$\Delta G^0$  can be computed directly from the Gibbs free energy of the solution phase geometries without thermodynamica cycles. Two approaches shown as follows have been used in the calculation:

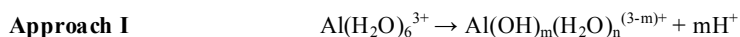

$\Delta G^0$  can be obtained by the following equation:

$$\Delta G^0 = \Delta G_{\text{(aq)}} = G_{\text{(aq)}}(\text{Al}(\text{OH})_m(\text{H}_2\text{O})_n^{(3-m)+}) + mG_{\text{(gas)}}(\text{H}^+) + m\Delta G_{\text{sol}}(\text{H}^+) - G_{\text{(aq)}}(\text{Al}(\text{H}_2\text{O})_6^{3+})$$

in which  $G_{\text{(gas)}}(\text{H}^+)$  is -6.28 kcal/mol and  $\Delta G_{\text{sol}}(\text{H}^+)$  is -264.61 kcal/mol.

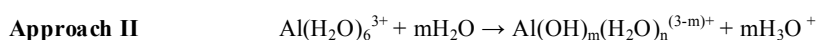

$\Delta G^0$  can be obtained by the following equations:

$$\Delta G^0 = \Delta G_{\text{(aq)}} - mRT \ln[\text{H}_2\text{O}]$$

$$\Delta G_{\text{(aq)}} = G_{\text{(aq)}}(\text{Al}(\text{OH})_m(\text{H}_2\text{O})_n^{(3-m)+}) + mG_{\text{(aq)}}(\text{H}_3\text{O}^+) - G_{\text{(aq)}}(\text{Al}(\text{H}_2\text{O})_6^{3+}) - mG_{\text{(aq)}}(\text{H}_2\text{O})$$

The parameters m, R and T are the number of water molecules acting as reactant, the gas constant and temperature in Kelvin, respectively.

### 4. The optimized structures of the gas phase structures without using the supermolecule medel.

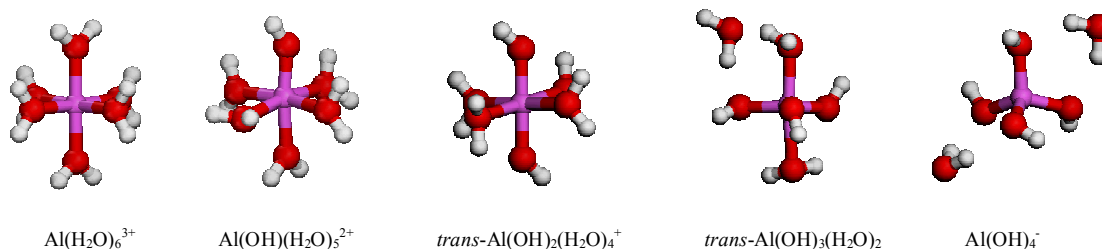

Fig. S1 The optimized structures of the hydrolysis products with one hydration shell

### 5. The calculated Gibbs free energies and the solvation energies of the gas phase structures without using the supermolecule density functional calculations

Table S3 The Gibbs free energies and the solvation energies of the structures with one hydration shell

| Charge | Complex                                                | Gibbs free energies / a.u. | Solvation energies / kcal·mol <sup>-1</sup> |
|--------|--------------------------------------------------------|----------------------------|---------------------------------------------|
| +3     | $\text{Al}(\text{H}_2\text{O})_6^{3+}$                 | -699.996952                | -470.13                                     |
| +2     | $\text{Al}(\text{OH})(\text{H}_2\text{O})_5^{2+}$      | -699.946462                | -210.66                                     |
| +1     | $\text{trans-Al}(\text{OH})_2(\text{H}_2\text{O})_4^+$ | -699.745995                | -69.44                                      |
| 0      | $\text{trans-Al}(\text{OH})_3(\text{H}_2\text{O})_2$   | -699.395537                | -17.30                                      |
| -1     | $\text{Al}(\text{OH})_4^-$                             | -698.903103                | -55.17                                      |

## 6. Cartesian coordinates of the most stable gas phase structures optimized using the supermolecule density functional calculations at B3LYP/6-31+G(d,p)

### Al(H<sub>2</sub>O)<sub>6</sub><sup>3+</sup>•12H<sub>2</sub>O

|    |             |             |             |
|----|-------------|-------------|-------------|
| Al | 1.50000000  | 0.00000000  | 0.00000000  |
| O  | 0.41020477  | 1.55638888  | 0.00000000  |
| O  | 0.41020477  | -0.77819444 | 1.34787231  |
| O  | 0.41020477  | -0.77819444 | -1.34787231 |
| O  | 2.58979523  | -1.55638888 | 0.00000000  |
| O  | 2.58979523  | 0.77819444  | -1.34787231 |
| O  | 2.58979523  | 0.77819447  | 1.34787230  |
| O  | -0.11650460 | 3.01244355  | 2.26697510  |
| O  | -0.11603797 | 2.91629653  | -2.21274273 |
| O  | -0.11650460 | -3.46947980 | 1.47536510  |
| O  | -0.11603797 | 0.45814315  | 3.63195824  |
| O  | -0.11650460 | 0.45703625  | -3.74234019 |
| O  | -0.11603797 | -3.37443968 | -1.41921551 |
| O  | 3.11586053  | -3.01119319 | -2.26886527 |
| O  | 3.11668216  | -2.91718081 | 2.21106207  |
| O  | 3.11586053  | 3.47049156  | -1.47333716 |
| O  | 3.11668216  | -0.45624551 | -3.63188372 |
| O  | 3.11586053  | -0.45929830 | 3.74220244  |
| O  | 3.11668216  | 3.37342635  | 1.42082160  |
| H  | 0.08558477  | 2.01999430  | 0.79637986  |
| H  | 0.08558477  | 2.01999430  | -0.79637986 |
| H  | 0.08558477  | -1.69968233 | 1.35117645  |
| H  | 0.08558477  | -0.32031196 | 2.14755630  |
| H  | 0.08558477  | -0.32031196 | -2.14755630 |
| H  | 0.08558477  | -1.69968233 | -1.35117645 |
| H  | 2.91441523  | -2.01999430 | -0.79637986 |
| H  | 2.91441523  | -2.01999430 | 0.79637986  |
| H  | 2.91441523  | 1.69968233  | -1.35117645 |
| H  | 2.91441523  | 0.32031196  | -2.14755630 |
| H  | 2.91441523  | 0.32031200  | 2.14755630  |
| H  | 2.91441523  | 1.69968236  | 1.35117642  |
| H  | -0.08146865 | 2.35005594  | 2.98429241  |
| H  | -0.95024317 | 3.49385178  | 2.43327337  |
| H  | -0.08146865 | -3.75950101 | 0.54306194  |
| H  | -0.95024317 | -3.85420244 | 1.80912771  |
| H  | -0.08146865 | 1.40944507  | -3.52735435 |
| H  | -0.95024317 | 0.36035066  | -4.24240108 |

|   |             |             |             |
|---|-------------|-------------|-------------|
| H | 0.72797803  | 3.40829410  | -2.20252575 |
| H | -0.79563257 | 3.61766261  | -2.24041578 |
| H | 0.72797803  | 0.20329620  | 4.05293215  |
| H | -0.79563257 | 0.13142568  | 4.25319561  |
| H | 0.72797803  | -3.61159030 | -1.85040641 |
| H | -0.79563257 | -3.74908828 | -2.01277983 |
| H | 3.08082458  | -2.34880559 | -2.98618259 |
| H | 3.94959911  | -3.27482774 | -2.70464710 |
| H | 3.08082458  | 3.76051278  | -0.54103401 |
| H | 3.94959911  | 3.97970697  | -1.48376046 |
| H | 3.08082458  | -1.41170713 | 3.52721663  |
| H | 3.94959911  | -0.70487916 | 4.18840758  |
| H | 2.26792793  | -3.40105029 | 2.21500872  |
| H | 3.51673047  | -3.13900617 | 3.07436031  |
| H | 2.26792793  | -0.21772867 | -4.05290031 |
| H | 3.51673047  | -1.09297104 | -4.25563924 |
| H | 2.26792793  | 3.61877900  | 1.83789153  |
| H | 3.51673047  | 4.23197724  | 1.18127886  |

**Al(OH)(H<sub>2</sub>O)<sub>5</sub><sup>2+</sup>•12H<sub>2</sub>O**

|    |             |             |             |
|----|-------------|-------------|-------------|
| Al | 0.02710000  | -0.12830000 | 0.07690000  |
| O  | 1.33120000  | -0.86080000 | 1.04070000  |
| O  | -1.42010000 | -0.83420000 | 1.14150000  |
| O  | -0.04210000 | 1.57720000  | 1.06840000  |
| O  | -1.43070000 | 0.69790000  | -0.99710000 |
| O  | 1.24870000  | 0.74460000  | -1.20500000 |
| O  | -0.06340000 | -1.65990000 | -1.11210000 |
| O  | 2.41660000  | -3.27480000 | 1.18000000  |
| O  | 3.87480000  | 0.73240000  | 1.20240000  |
| O  | -3.84560000 | 0.52000000  | 1.21830000  |
| O  | -1.64740000 | -3.38890000 | 1.60350000  |
| O  | 2.30790000  | 2.91850000  | 1.34790000  |
| O  | -2.42500000 | 2.97550000  | 1.17930000  |
| O  | -1.38350000 | 3.42510000  | -1.37540000 |
| O  | -3.80380000 | -0.64280000 | -1.32070000 |
| O  | 3.63150000  | -0.48940000 | -1.33870000 |
| O  | 1.39980000  | 3.52400000  | -1.18570000 |
| O  | -2.39740000 | -3.11850000 | -1.13520000 |
| O  | 2.32960000  | -2.89790000 | -1.34660000 |

|   |             |             |             |
|---|-------------|-------------|-------------|
| H | 1.89600000  | -2.44530000 | 1.34370000  |
| H | 2.02780000  | -0.31400000 | 1.42740000  |
| H | -2.29110000 | -0.40390000 | 1.28170000  |
| H | -1.44310000 | -1.77930000 | 1.46780000  |
| H | 0.76740000  | 2.06190000  | 1.36040000  |
| H | -0.85620000 | 2.07760000  | 1.29720000  |
| H | -1.42730000 | 1.62640000  | -1.32140000 |
| H | -2.22890000 | 0.22030000  | -1.31820000 |
| H | 2.14520000  | 0.33620000  | -1.33750000 |
| H | 1.31380000  | 1.71480000  | -1.34080000 |
| H | -0.84730000 | -2.25560000 | -1.17130000 |
| H | 0.77250000  | -2.18010000 | -1.26260000 |
| H | 2.12280000  | -3.96970000 | 1.78070000  |
| H | -3.55200000 | 1.45720000  | 1.23090000  |
| H | -4.51020000 | 0.41920000  | 1.91530000  |
| H | 3.00440000  | 2.20890000  | 1.32110000  |
| H | 2.55430000  | 3.53410000  | 2.05320000  |
| H | 4.01010000  | 0.26020000  | 0.35360000  |
| H | 4.63340000  | 0.53360000  | 1.76850000  |
| H | -2.08530000 | -3.70180000 | 0.79250000  |
| H | -1.94480000 | -3.92890000 | 2.34730000  |
| H | -2.25760000 | 3.38010000  | 0.30020000  |
| H | -2.65690000 | 3.69250000  | 1.78780000  |
| H | -0.42760000 | 3.65960000  | -1.33320000 |
| H | -1.76930000 | 3.93280000  | -2.10410000 |
| H | 3.32630000  | -1.43310000 | -1.36400000 |
| H | 4.28380000  | -0.38210000 | -2.04570000 |
| H | -3.07310000 | -2.41790000 | -1.24740000 |
| H | -2.58650000 | -3.80340000 | -1.79260000 |
| H | -4.14150000 | -0.27590000 | -0.47520000 |
| H | -4.48990000 | -0.50720000 | -1.99040000 |
| H | 1.82660000  | 3.56020000  | -0.29780000 |
| H | 1.93110000  | 4.06910000  | -1.78430000 |
| H | 2.42860000  | -3.25180000 | -0.40320000 |
| H | 2.54400000  | -3.61030000 | -1.96500000 |

***trans*-Al(OH)<sub>2</sub>(H<sub>2</sub>O)<sub>4</sub><sup>+</sup>•12H<sub>2</sub>O**

|    |             |             |             |
|----|-------------|-------------|-------------|
| Al | 0.00010000  | 0.00040000  | -0.00010000 |
| O  | 0.97060000  | -1.23840000 | -1.23130000 |
| O  | 0.57370000  | 1.45500000  | -0.92770000 |
| O  | -1.58000000 | -0.16150000 | -1.19380000 |

|   |             |             |             |
|---|-------------|-------------|-------------|
| O | -0.97000000 | 1.23930000  | 1.23090000  |
| O | -0.57360000 | -1.45400000 | 0.92780000  |
| O | 1.58120000  | 0.16130000  | 1.19250000  |
| O | 3.74730000  | -1.13490000 | -1.07580000 |
| O | -0.14460000 | -3.76200000 | -1.20910000 |
| O | -0.74850000 | 3.70240000  | -1.19690000 |
| O | 3.81240000  | 1.54770000  | -1.26790000 |
| O | -2.68860000 | -2.67820000 | -1.03880000 |
| O | -3.23570000 | 2.02710000  | -1.50630000 |
| O | -3.74640000 | 1.13370000  | 1.07820000  |
| O | 0.14470000  | 3.76250000  | 1.20840000  |
| O | 0.74910000  | -3.70160000 | 1.19620000  |
| O | -3.81550000 | -1.54880000 | 1.26600000  |
| O | 2.68840000  | 2.67770000  | 1.03890000  |
| O | 3.23560000  | -2.02770000 | 1.50850000  |
| H | 1.95310000  | -1.27590000 | -1.22500000 |
| H | 0.61190000  | -2.15180000 | -1.34000000 |
| H | 1.18820000  | 1.27950000  | -1.64920000 |
| H | -2.10390000 | -0.99300000 | -1.19630000 |
| H | -2.10600000 | 0.59910000  | -1.52170000 |
| H | -1.95260000 | 1.27510000  | 1.22720000  |
| H | -0.61230000 | 2.15330000  | 1.33880000  |
| H | 0.26500000  | -2.82620000 | 1.25820000  |
| H | -1.18740000 | -1.27840000 | 1.64990000  |
| H | 2.10410000  | 0.99340000  | 1.19830000  |
| H | 2.10600000  | -0.59930000 | 1.52230000  |
| H | 3.88650000  | -0.15360000 | -1.15470000 |
| H | 4.29230000  | -1.55190000 | -1.75620000 |
| H | -1.68010000 | 3.48780000  | -1.36220000 |
| H | -0.26500000 | 2.82660000  | -1.25850000 |
| H | -1.82480000 | -3.16280000 | -1.03350000 |
| H | -3.23850000 | -3.09230000 | -1.71690000 |
| H | 0.25320000  | -3.93700000 | -0.29050000 |
| H | 0.05480000  | -4.51730000 | -1.77720000 |
| H | 3.43290000  | 2.07760000  | -0.53410000 |
| H | 4.43230000  | 2.11270000  | -1.74480000 |
| H | -3.67500000 | 1.83840000  | -0.65000000 |
| H | -3.92530000 | 2.19100000  | -2.16270000 |
| H | -3.88670000 | 0.15250000  | 1.15680000  |
| H | -4.29090000 | 1.55100000  | 1.75890000  |
| H | 1.68050000  | -3.48620000 | 1.36160000  |

|   |             |             |            |
|---|-------------|-------------|------------|
| H | 1.82460000  | 3.16230000  | 1.03270000 |
| H | 3.23820000  | 3.09300000  | 1.71630000 |
| H | -0.25270000 | 3.93750000  | 0.28950000 |
| H | -0.05410000 | 4.51820000  | 1.77600000 |
| H | -3.43430000 | -2.07890000 | 0.53310000 |
| H | -4.43630000 | -2.11380000 | 1.74190000 |
| H | 3.67530000  | -1.83890000 | 0.65230000 |
| H | 3.92480000  | -2.19300000 | 2.16500000 |

***trans*-Al(OH)<sub>3</sub>(H<sub>2</sub>O)<sub>2</sub>•13H<sub>2</sub>O**

|    |             |             |             |
|----|-------------|-------------|-------------|
| Al | -0.15770000 | 0.56150000  | -0.60530000 |
| O  | -0.56810000 | 2.08140000  | 0.68140000  |
| O  | 1.41490000  | 1.39260000  | -1.00320000 |
| O  | -0.08080000 | -0.56410000 | 0.77570000  |
| O  | 0.34930000  | -0.92230000 | -1.94070000 |
| O  | -1.64510000 | 0.81230000  | -1.50000000 |
| H  | 0.12710000  | 2.23470000  | 1.35360000  |
| H  | -2.15150000 | 1.63450000  | -1.37050000 |
| H  | 0.75460000  | -1.03120000 | 0.94250000  |
| H  | 1.75060000  | 1.19330000  | -1.88630000 |
| H  | -0.32080000 | -1.64970000 | -1.94700000 |
| H  | -3.30160000 | -1.79680000 | -1.81590000 |
| O  | -3.69990000 | -0.94930000 | -1.56280000 |
| H  | -2.94770000 | -0.30600000 | -1.63970000 |
| H  | -1.42500000 | -3.85940000 | -1.91170000 |
| O  | -1.50860000 | -2.95410000 | -1.58990000 |
| H  | -1.57820000 | -2.99540000 | -0.59250000 |
| H  | -3.59120000 | 2.49120000  | 0.09370000  |
| O  | -3.55960000 | 2.84660000  | -0.81720000 |
| H  | -4.37390000 | 2.55820000  | -1.24780000 |
| H  | 1.58020000  | 3.11920000  | -0.76100000 |
| O  | 1.75140000  | 4.02970000  | -0.40930000 |
| H  | 0.96510000  | 4.54530000  | -0.63000000 |
| O  | 4.86170000  | -0.18990000 | -1.11540000 |
| H  | 5.81400000  | -0.30320000 | -1.01840000 |
| H  | 4.53150000  | 0.27340000  | -0.31080000 |
| H  | 3.71500000  | -1.42790000 | -1.49510000 |
| O  | 2.94670000  | -2.05450000 | -1.52500000 |
| H  | 1.22320000  | -1.34370000 | -1.80070000 |
| H  | -1.08420000 | -3.22310000 | 1.62750000  |
| O  | -1.63630000 | -2.64670000 | 1.06390000  |

|   |             |             |             |
|---|-------------|-------------|-------------|
| H | -1.09440000 | -1.79960000 | 1.00010000  |
| O | 2.43950000  | -1.94240000 | 1.29450000  |
| H | 2.82960000  | -1.04810000 | 1.38760000  |
| H | 2.67660000  | -2.22510000 | 0.39160000  |
| H | -3.94520000 | -0.92410000 | 0.17480000  |
| O | -3.86450000 | -0.86360000 | 1.16230000  |
| H | -3.23200000 | -1.57370000 | 1.38580000  |
| H | -3.41550000 | 1.83760000  | 2.50410000  |
| O | -3.06490000 | 1.56680000  | 1.64700000  |
| H | -3.34970000 | 0.60070000  | 1.50460000  |
| O | 1.81150000  | 2.95100000  | 2.03360000  |
| H | 1.86530000  | 3.51090000  | 2.81740000  |
| H | 1.86350000  | 3.54360000  | 1.23610000  |
| O | 3.26600000  | 0.74520000  | 0.86230000  |
| H | 3.13550000  | 1.44340000  | 1.52890000  |
| H | 2.58680000  | 0.97300000  | 0.17000000  |
| H | 1.30710000  | -3.15470000 | 2.15720000  |
| O | 0.61180000  | -3.80000000 | 2.39850000  |
| H | 0.75820000  | -4.02790000 | 3.32360000  |
| H | -1.42250000 | 1.90690000  | 1.15370000  |
| H | 3.19970000  | -2.78510000 | -2.10280000 |

**Al(OH)<sub>4</sub>·14H<sub>2</sub>O**

|    |             |             |             |
|----|-------------|-------------|-------------|
| Al | 0.03580000  | -0.07010000 | -1.50260000 |
| O  | -0.00890000 | -0.28950000 | 0.31270000  |
| O  | 1.56620000  | 0.67900000  | -1.97920000 |
| O  | -0.14360000 | -1.73260000 | -2.10220000 |
| O  | -1.32290000 | 0.96650000  | -1.98790000 |
| O  | 0.20150000  | 1.72450000  | 2.47350000  |
| O  | -1.98080000 | -1.72510000 | 1.41310000  |
| O  | 2.52340000  | 2.43700000  | 1.57010000  |
| O  | -2.17100000 | 2.68520000  | 1.65230000  |
| O  | 1.70920000  | -2.01040000 | 1.41890000  |
| O  | 3.80180000  | 0.03250000  | 1.25520000  |
| O  | -3.86970000 | 0.33810000  | 1.25950000  |
| O  | -0.35420000 | -3.02310000 | 3.13170000  |
| O  | 3.86200000  | -0.65460000 | -1.42380000 |
| O  | 1.55050000  | 3.45860000  | -0.88690000 |
| O  | -2.54850000 | -2.63320000 | -1.26220000 |
| O  | 2.34350000  | -3.14010000 | -0.96680000 |
| O  | -1.09510000 | 3.41270000  | -0.97600000 |
| O  | -3.91690000 | -0.38510000 | -1.49710000 |



|   |             |             |             |
|---|-------------|-------------|-------------|
| H | 0.06180000  | 0.50030000  | 0.87550000  |
| H | 1.67530000  | 1.61910000  | -1.76530000 |
| H | 0.60890000  | -2.32460000 | -1.94990000 |
| H | -2.22320000 | 0.60790000  | -1.93250000 |
| H | 1.12380000  | 2.04140000  | 2.18450000  |
| H | 0.32230000  | 1.09250000  | 3.19210000  |
| H | -1.27060000 | -1.17380000 | 0.97470000  |
| H | -2.72000000 | -1.08930000 | 1.54910000  |
| H | 3.04010000  | 1.60230000  | 1.41660000  |
| H | 2.32410000  | 2.82260000  | 0.69200000  |
| H | 1.08430000  | -1.35430000 | 0.99300000  |
| H | 1.16260000  | -2.46380000 | 2.09270000  |
| H | -3.34330000 | 1.15570000  | 1.34510000  |
| H | -4.01240000 | 0.20420000  | 0.30050000  |
| H | -1.31080000 | 2.36070000  | 2.02480000  |
| H | -2.50130000 | 3.34960000  | 2.26830000  |
| H | 3.19560000  | -0.67350000 | 1.54670000  |
| H | 3.94340000  | -0.17130000 | 0.29670000  |
| H | -1.05850000 | -2.56240000 | 2.60400000  |
| H | -0.58510000 | -3.95880000 | 3.11040000  |
| H | 3.06230000  | -0.14000000 | -1.71400000 |
| H | 3.56040000  | -1.57940000 | -1.42680000 |
| H | -1.65620000 | -2.41060000 | -1.65020000 |
| H | -2.40700000 | -2.57640000 | -0.29590000 |
| H | -1.24860000 | 2.53470000  | -1.43630000 |
| H | -1.52060000 | 3.30670000  | -0.10600000 |
| H | 0.54720000  | 3.51770000  | -0.89810000 |
| H | 1.88020000  | 4.20920000  | -1.39350000 |
| H | 2.58380000  | -4.07290000 | -0.94240000 |
| H | 2.13980000  | -2.86850000 | -0.03410000 |
| H | -3.46870000 | -1.28630000 | -1.48040000 |
| H | -4.62780000 | -0.43210000 | -2.14590000 |

**7. Cartesian coordinates of the solution phase structures optimized using the supermolecule density functional calculations at B3LYP/6-31+G(d,p) with PCM calculation**

**Al(H<sub>2</sub>O)<sub>6</sub><sup>3+</sup>•12H<sub>2</sub>O**

|    |             |             |             |
|----|-------------|-------------|-------------|
| Al | 0.00015200  | 0.00103400  | -0.00607300 |
| O  | -1.12725000 | -1.09196300 | 1.09451100  |
| O  | -0.38422900 | 1.52491600  | 1.09290000  |

|   |             |             |             |
|---|-------------|-------------|-------------|
| O | 1.50754900  | -0.42793300 | 1.09754800  |
| O | 1.12808100  | 1.09351600  | -1.10640300 |
| O | 0.38441200  | -1.52268700 | -1.10461600 |
| O | -1.50912600 | 0.42776100  | -1.10720400 |
| O | -3.66541800 | -0.36944100 | 1.34998100  |
| O | -0.56230600 | -3.68514800 | 1.26166100  |
| O | 1.51789800  | 3.35718900  | 1.34338400  |
| O | -2.91421300 | 2.32771500  | 1.26598200  |
| O | 2.15085400  | -2.98723300 | 1.34639300  |
| O | 3.47455600  | 1.35270200  | 1.26548200  |
| O | 3.66976200  | 0.36622900  | -1.33743700 |
| O | 0.56016400  | 3.68851300  | -1.26010600 |
| O | -1.51569700 | -3.35720800 | -1.34347500 |
| O | 2.91565000  | -2.32897300 | -1.25783300 |
| O | -2.15504100 | 2.98921000  | -1.34040400 |
| O | -3.47618600 | -1.35782400 | -1.25708200 |
| H | -2.07242900 | -0.85690800 | 1.31136200  |
| H | -0.95052500 | -2.05371900 | 1.28376500  |
| H | 0.29242300  | 2.22490700  | 1.31118800  |
| H | -1.30579400 | 1.85120300  | 1.28362600  |
| H | 1.77597400  | -1.36459300 | 1.31274200  |
| H | 2.25368100  | 0.20427100  | 1.28723300  |
| H | 2.07455400  | 0.85950600  | -1.31785100 |
| H | 0.95162100  | 2.05594100  | -1.29301100 |
| H | -0.29134000 | -2.22506500 | -1.31840500 |
| H | 1.30615500  | -1.85098500 | -1.29056700 |
| H | -1.78035000 | 1.36422200  | -1.31957600 |
| H | -2.25594300 | -0.20536000 | -1.29005100 |
| H | -3.66675600 | 0.61243800  | 1.38520800  |
| H | -4.22494500 | -0.68372600 | 2.08752200  |
| H | 2.36673400  | 2.86337600  | 1.37587800  |
| H | 1.53154700  | 3.99761500  | 2.08200200  |
| H | 1.30092000  | -3.47922100 | 1.37902500  |
| H | 2.70075300  | -3.31625900 | 2.08473000  |
| H | -0.95502500 | -3.96570700 | 0.40803400  |
| H | -0.94267900 | -4.26042900 | 1.95562200  |
| H | -2.96170200 | 2.80706100  | 0.41172900  |
| H | -3.21745300 | 2.94717400  | 1.95981000  |
| H | 3.91467600  | 1.15043000  | 0.41278900  |
| H | 4.16165000  | 1.31163800  | 1.96070700  |
| H | 3.66812100  | -0.61591900 | -1.37043200 |

|   |             |             |             |
|---|-------------|-------------|-------------|
| H | 4.23673900  | 0.67606000  | -2.07105700 |
| H | -2.36563300 | -2.86522700 | -1.37421400 |
| H | -1.52943600 | -3.99904200 | -2.08076200 |
| H | -1.30493000 | 3.48069000  | -1.37321000 |
| H | -2.70638400 | 3.32222300  | -2.07592800 |
| H | 0.95507600  | 3.96630600  | -0.40679100 |
| H | 0.93764600  | 4.26685100  | -1.95289500 |
| H | 2.95864400  | -2.80849100 | -0.40341200 |
| H | 3.22700000  | -2.94674100 | -1.94961900 |
| H | -3.91395800 | -1.15581700 | -0.40311200 |
| H | -4.16628300 | -1.31685400 | -1.94939100 |

**Al(OH)(H<sub>2</sub>O)<sub>5</sub><sup>2+</sup>•12H<sub>2</sub>O**

|    |             |             |             |
|----|-------------|-------------|-------------|
| Al | -0.03496200 | -0.11918400 | -0.11301800 |
| O  | -1.33191900 | -0.88526300 | -1.10631500 |
| O  | 1.40808800  | -0.80770500 | -1.20181800 |
| O  | 0.00119700  | 1.54403000  | -1.14108900 |
| O  | 1.36072000  | 0.70093900  | 1.00842100  |
| O  | -1.29838500 | 0.70545400  | 1.14841800  |
| O  | 0.06919800  | -1.66466000 | 1.06533300  |
| O  | -2.28553200 | -3.33336300 | -1.33459100 |
| O  | -3.89479200 | 0.68192100  | -1.15392800 |
| O  | 3.72975100  | 0.59380700  | -1.27932700 |
| O  | 1.88931100  | -3.38300000 | -1.40516100 |
| O  | -2.31690300 | 2.89359100  | -1.26679400 |
| O  | 2.29205000  | 2.98411500  | -1.19492200 |
| O  | 1.34722000  | 3.36703400  | 1.37812700  |
| O  | 3.77061100  | -0.47605200 | 1.27404400  |
| O  | -3.63627300 | -0.58418600 | 1.33763700  |
| O  | -1.41944600 | 3.41419600  | 1.28104900  |
| O  | 2.45493800  | -2.92865400 | 1.28490900  |
| O  | -2.28121100 | -2.98162000 | 1.27025600  |
| H  | -1.84136500 | -2.43520800 | -1.37131500 |
| H  | -2.08207000 | -0.33472900 | -1.37483000 |
| H  | 2.27335900  | -0.33943600 | -1.30763500 |
| H  | 1.53810700  | -1.78453100 | -1.38062200 |
| H  | -0.82119100 | 2.06947100  | -1.32137900 |
| H  | 0.80730100  | 2.09846100  | -1.28934200 |
| H  | 1.37769900  | 1.65910900  | 1.26069200  |
| H  | 2.22473300  | 0.27784700  | 1.23989900  |
| H  | -2.18637800 | 0.28291000  | 1.28942600  |

|   |             |             |             |
|---|-------------|-------------|-------------|
| H | -1.35887200 | 1.67536500  | 1.32817400  |
| H | 0.88922100  | -2.19919400 | 1.21395000  |
| H | -0.74504100 | -2.21664400 | 1.20294100  |
| H | -1.71768000 | -3.96462900 | -1.80745600 |
| H | 3.42828500  | 1.52977000  | -1.30013000 |
| H | 4.36369600  | 0.48178200  | -2.01387800 |
| H | -3.01628300 | 2.19309800  | -1.26605200 |
| H | -2.52946600 | 3.51418400  | -1.99001800 |
| H | -4.03799100 | 0.21460900  | -0.30393300 |
| H | -4.69119200 | 0.53895500  | -1.69730500 |
| H | 2.27326600  | -3.52753500 | -0.51674500 |
| H | 2.53754500  | -3.71460900 | -2.05361200 |
| H | 2.16807200  | 3.40889900  | -0.31850000 |
| H | 2.44906400  | 3.69980800  | -1.84170500 |
| H | 0.39499500  | 3.61418500  | 1.40773500  |
| H | 1.77876100  | 3.79141500  | 2.14484400  |
| H | -3.31922100 | -1.51948400 | 1.37127400  |
| H | -4.23600300 | -0.45573600 | 2.09717600  |
| H | 3.10201000  | -2.19313600 | 1.36392300  |
| H | 2.63957100  | -3.55201200 | 2.01336900  |
| H | 4.11970600  | -0.12867500 | 0.42467700  |
| H | 4.40490400  | -0.22158200 | 1.97266100  |
| H | -1.86256600 | 3.52816700  | 0.41041000  |
| H | -1.95666400 | 3.89033700  | 1.94381300  |
| H | -2.35271800 | -3.33405600 | 0.33747800  |
| H | -2.43008700 | -3.72245700 | 1.88724700  |

***trans*-Al(OH)<sub>2</sub>(H<sub>2</sub>O)<sub>4</sub><sup>+</sup>•12H<sub>2</sub>O**

|    |             |             |             |
|----|-------------|-------------|-------------|
| Al | 0.00258000  | -0.00255000 | 0.00060400  |
| O  | -0.80868600 | -1.33417500 | 1.23446000  |
| O  | -0.67719100 | 1.36967100  | 1.00475400  |
| O  | 1.61120400  | -0.04760300 | 1.16978400  |
| O  | 0.81967600  | 1.32810100  | -1.23420800 |
| O  | 0.68476200  | -1.37370000 | -1.00239700 |
| O  | -1.60798100 | 0.04499100  | -1.16540900 |
| O  | -3.52372200 | -1.41560500 | 1.18797400  |
| O  | 0.51479500  | -3.72471700 | 1.12569800  |
| O  | 0.46976100  | 3.69485400  | 1.32597400  |
| O  | -4.38342000 | 1.14183900  | 1.06262200  |
| O  | 2.97957300  | -2.40147900 | 1.00286400  |
| O  | 3.03083300  | 2.28079500  | 1.43850900  |

|   |             |             |             |
|---|-------------|-------------|-------------|
| O | 3.53439800  | 1.44056800  | -1.13201200 |
| O | -0.48809600 | 3.72679200  | -1.13754800 |
| O | -0.46408800 | -3.69589100 | -1.33232200 |
| O | 4.28304200  | -1.15258600 | -1.15898400 |
| O | -2.95399700 | 2.40881600  | -1.00748800 |
| O | -3.03181200 | -2.28840900 | -1.38090000 |
| H | -1.79409800 | -1.42705000 | 1.27380600  |
| H | -0.38263500 | -2.22479100 | 1.30129200  |
| H | -1.08095700 | 1.08615900  | 1.84123500  |
| H | 2.21506200  | -0.82724800 | 1.12656900  |
| H | 2.10289100  | 0.76824500  | 1.42352300  |
| H | 1.80531900  | 1.42763200  | -1.24868500 |
| H | 0.39571000  | 2.21946500  | -1.30057800 |
| H | -0.02853600 | -2.78499400 | -1.30497700 |
| H | 1.10145500  | -1.09054900 | -1.83200300 |
| H | -2.20477900 | 0.83024000  | -1.11528500 |
| H | -2.11522500 | -0.76916000 | -1.39339100 |
| H | -3.84056200 | -0.47289000 | 1.14187800  |
| H | -4.00334000 | -1.83944700 | 1.92387400  |
| H | 1.42108300  | 3.49714500  | 1.39640000  |
| H | 0.03545700  | 2.78377700  | 1.29911000  |
| H | 2.17577100  | -2.97215200 | 0.96939500  |
| H | 3.50243400  | -2.70665400 | 1.76795100  |
| H | 0.12102400  | -3.95106200 | 0.23528900  |
| H | 0.36403800  | -4.47965000 | 1.72376000  |
| H | -3.93101600 | 1.70074000  | 0.39465700  |
| H | -5.33904200 | 1.25415100  | 0.90964000  |
| H | 3.45199800  | 2.16641500  | 0.55712900  |
| H | 3.74901800  | 2.41582300  | 2.08389500  |
| H | 3.85912200  | 0.49911000  | -1.12074700 |
| H | 4.01706100  | 1.89723400  | -1.84609700 |
| H | -1.41678100 | -3.49686900 | -1.37942700 |
| H | -2.14941000 | 2.97851300  | -0.98377600 |
| H | -3.48132000 | 2.70873400  | -1.77176600 |
| H | -0.09772500 | 3.95468400  | -0.24610800 |
| H | -0.33361300 | 4.47897000  | -1.73801200 |
| H | 3.90263300  | -1.66420300 | -0.41276200 |
| H | 5.23772800  | -1.34688100 | -1.16494400 |
| H | -3.45664200 | -2.16858300 | -0.50232900 |
| H | -3.74806600 | -2.42980300 | -2.02733300 |

***trans*-Al(OH)<sub>3</sub>(H<sub>2</sub>O)<sub>2</sub>•13H<sub>2</sub>O**

|    |             |             |             |
|----|-------------|-------------|-------------|
| Al | -0.12181500 | 0.60771500  | -0.60560800 |
| O  | -0.50566100 | 2.13581100  | 0.64902100  |
| O  | 1.48694300  | 1.35760500  | -0.97123500 |
| O  | -0.14892200 | -0.53614400 | 0.77572700  |
| O  | 0.29875300  | -0.88810600 | -1.93715500 |
| O  | -1.60654300 | 0.92591200  | -1.53054000 |
| H  | 0.22266300  | 2.34485800  | 1.28429300  |
| H  | -2.10734800 | 1.73555600  | -1.31772900 |
| H  | 0.67059200  | -1.04067200 | 0.92755100  |
| H  | 1.85955300  | 1.14978500  | -1.84837400 |
| H  | -0.37711700 | -1.61243500 | -1.91421700 |
| H  | -3.19880100 | -1.69575700 | -1.85430800 |
| O  | -3.63716400 | -0.84449900 | -1.67329300 |
| H  | -2.88482600 | -0.19120700 | -1.67830400 |
| H  | -1.43440500 | -3.75669900 | -1.98859100 |
| O  | -1.59349100 | -2.86839800 | -1.62162300 |
| H  | -1.65762500 | -2.96033900 | -0.63427600 |
| H  | -3.47238200 | 2.65938300  | 0.15633300  |
| O  | -3.42012800 | 3.04869300  | -0.74178900 |
| H  | -4.30529600 | 2.94551200  | -1.13191700 |
| H  | 1.93659000  | 3.04717600  | -0.73966400 |
| O  | 2.28819900  | 3.90921900  | -0.40266700 |
| H  | 1.70658500  | 4.60251900  | -0.76074500 |
| O  | 4.84397800  | -0.45934700 | -1.11660300 |
| H  | 5.73146500  | -0.82924300 | -0.96127900 |
| H  | 4.57673900  | -0.01303400 | -0.28530700 |
| H  | 3.56646000  | -1.59028900 | -1.48865000 |
| O  | 2.73739300  | -2.13516500 | -1.47473400 |
| H  | 1.17741700  | -1.32305600 | -1.82093500 |
| H  | -1.22674500 | -3.16287500 | 1.64694900  |
| O  | -1.75541500 | -2.57671800 | 1.06788800  |
| H  | -1.17711600 | -1.75324600 | 0.98629700  |
| O  | 2.26876700  | -2.05576000 | 1.28262300  |
| H  | 2.72638100  | -1.21441700 | 1.48640000  |
| H  | 2.51486500  | -2.24301600 | 0.35137300  |
| H  | -3.95643900 | -0.83141200 | 0.08304600  |
| O  | -3.95075700 | -0.80811700 | 1.07253300  |
| H  | -3.30454200 | -1.50564300 | 1.30766700  |
| H  | -3.32597700 | 1.93377700  | 2.53070000  |
| O  | -3.01855800 | 1.65984200  | 1.64793100  |

|   |             |             |             |
|---|-------------|-------------|-------------|
| H | -3.34837800 | 0.72884200  | 1.49801500  |
| O | 1.75127900  | 2.88579500  | 2.04140600  |
| H | 1.70986800  | 3.43317100  | 2.84608800  |
| H | 2.01951000  | 3.47921400  | 1.29746000  |
| O | 3.30318100  | 0.59872300  | 0.93815600  |
| H | 3.20146600  | 1.26890300  | 1.63592600  |
| H | 2.64254300  | 0.87447400  | 0.25030400  |
| H | 1.11133600  | -3.24857800 | 2.15248300  |
| O | 0.39557900  | -3.86583100 | 2.40858600  |
| H | 0.50276100  | -4.02527900 | 3.36231700  |
| H | -1.33506000 | 1.97378800  | 1.16230700  |
| H | 2.91938600  | -2.94817100 | -1.98218100 |

**Al(OH)<sub>4</sub><sup>-</sup>•14H<sub>2</sub>O**

|    |             |             |             |
|----|-------------|-------------|-------------|
| Al | 0.03970200  | -0.03787300 | -1.46107200 |
| O  | 0.00845900  | -0.29065500 | 0.32939100  |
| O  | 1.50450400  | 0.83175000  | -1.97624700 |
| O  | 0.01213600  | -1.68643200 | -2.13582600 |
| O  | -1.37344100 | 0.89253400  | -2.01318000 |
| O  | 0.05322800  | 1.68354000  | 2.43705900  |
| O  | -1.89920200 | -1.87301900 | 1.38001400  |
| O  | 2.42335900  | 2.56688000  | 1.60531700  |
| O  | -2.36950700 | 2.58259400  | 1.61134400  |
| O  | 1.82806100  | -1.95433500 | 1.41870900  |
| O  | 3.77611500  | 0.16091700  | 1.27027000  |
| O  | -3.84867800 | 0.14785700  | 1.26522900  |
| O  | -0.12210100 | -3.14285000 | 3.07004700  |
| O  | 3.81757500  | -0.45143200 | -1.43115000 |
| O  | 1.40444700  | 3.49943800  | -0.82886200 |
| O  | -2.35870600 | -2.76462500 | -1.28120900 |
| O  | 2.46469000  | -2.94703900 | -1.05103300 |
| O  | -1.28914000 | 3.35264500  | -0.91393400 |
| O  | -3.85752600 | -0.51123500 | -1.47993900 |
| H  | 0.01146500  | 0.46168500  | 0.95138700  |
| H  | 1.57517500  | 1.75811600  | -1.68196200 |
| H  | 0.77822800  | -2.23950200 | -1.89978300 |
| H  | -2.25453000 | 0.49311400  | -1.89700500 |
| H  | 0.95076700  | 2.06845300  | 2.22242600  |
| H  | 0.12590200  | 1.26006900  | 3.31172300  |
| H  | -1.20144900 | -1.28350300 | 0.98014200  |
| H  | -2.65257400 | -1.25806400 | 1.53080900  |

|   |             |             |             |
|---|-------------|-------------|-------------|
| H | 2.94061400  | 1.73890900  | 1.44981700  |
| H | 2.17579300  | 2.92524900  | 0.72491100  |
| H | 1.16697700  | -1.32989400 | 1.01059200  |
| H | 1.30189500  | -2.46769700 | 2.07050200  |
| H | -3.36435900 | 0.99434700  | 1.36288700  |
| H | -3.96634500 | 0.01230200  | 0.30105700  |
| H | -1.50564700 | 2.33738200  | 2.02442900  |
| H | -2.78578100 | 3.23832800  | 2.20063800  |
| H | 3.18317900  | -0.55826100 | 1.56587700  |
| H | 3.88591500  | -0.01803900 | 0.30393300  |
| H | -0.88329200 | -2.76438300 | 2.57120300  |
| H | -0.24627000 | -4.10843000 | 3.06322800  |
| H | 2.99132300  | 0.04455200  | -1.68233300 |
| H | 3.53934200  | -1.38872600 | -1.41810600 |
| H | -1.48516600 | -2.46502900 | -1.64785400 |
| H | -2.25192200 | -2.67667800 | -0.31019100 |
| H | -1.38113300 | 2.47155900  | -1.37071100 |
| H | -1.71264800 | 3.21918400  | -0.04135100 |
| H | 0.40950600  | 3.55663500  | -0.82722100 |
| H | 1.73529100  | 4.30195000  | -1.27080800 |
| H | 2.77730000  | -3.86535400 | -1.13750900 |
| H | 2.28400400  | -2.79013500 | -0.09181800 |
| H | -3.42565200 | -1.40599800 | -1.50545200 |
| H | -4.62621100 | -0.54205200 | -2.07752000 |
